# Supplementary material for: Analysis of the Effect of 60Co-γ Irradiation Sterilization Technology on the Chemical Composition of Saffron Using UPLC and UPLC/Q-TOF-MS
Source: Hindawi journal article supplement (doi:10.1155/2018/2402676), 2018-01-01
Supplement: f2 [file 2402676.f2.pdf]

3. TABLE 1: Relative retention time feature graph of saffron

| Sample | Peak 1 | Peak 2 | Peak 3 | Peak 4 | Peak 5 | Peak 6 | Peak 7 | Peak 8<br>(S) | Peak 9 | Peak 10 | Peak 11 | Peak 12 | Peak<br>13 |
|--------|--------|--------|--------|--------|--------|--------|--------|---------------|--------|---------|---------|---------|------------|
| 1      | 0.225  | 0.241  | 0.305  | 0.362  | 0.385  | 0.605  | 0.937  | 1.000         | 1.095  | 1.162   | 1.170   | 1.205   | 1.286      |
| 2      | 0.225  | 0.241  | 0.305  | 0.361  | 0.385  | 0.603  | 0.936  | 1.000         | 1.095  | 1.163   | 1.170   | 1.205   | 1.286      |
| 3      | 0.225  | 0.241  | 0.305  | 0.361  | 0.385  | 0.602  | 0.936  | 1.000         | 1.095  | 1.163   | 1.170   | 1.205   | 1.286      |
| 4      | 0.225  | 0.241  | 0.305  | 0.361  | 0.385  | 0.602  | 0.936  | 1.000         | 1.095  | 1.163   | 1.170   | 1.205   | 1.286      |
| 5      | 0.225  | 0.241  | 0.305  | 0.360  | 0.385  | 0.602  | 0.936  | 1.000         | 1.095  | 1.162   | 1.168   | 1.205   | 1.286      |
| 6      | 0.225  | 0.241  | 0.305  | 0.360  | 0.385  | 0.602  | 0.936  | 1.000         | 1.095  | 1.162   | 1.170   | 1.205   | 1.286      |
| 7      | 0.225  | 0.241  | 0.305  | 0.360  | 0.385  | 0.602  | 0.936  | 1.000         | 1.095  | 1.162   | 1.170   | 1.205   | 1.286      |
| 8      | 0.225  | 0.241  | 0.305  | 0.361  | 0.385  | 0.602  | 0.936  | 1.000         | 1.095  | 1.162   | 1.170   | 1.205   | 1.286      |
| 9      | 0.225  | 0.241  | 0.305  | 0.360  | 0.385  | 0.602  | 0.936  | 1.000         | 1.095  | 1.162   | 1.170   | 1.205   | 1.286      |

10      0.225    0.241    0.305    0.360    0.385    0.602    0.936    1.000    1.095    1.162    1.170    1.205    1.286

4.

TABLE 2: Chemical components identified from non-irradiated and irradiated saffron

| peak no. | RT    | Experimental m/z | calculated m/z | Diff (ppm) | MS/MS Fragments             | Formula     | Proposed compounds        | 0 kGy | 10 kGy |
|----------|-------|------------------|----------------|------------|-----------------------------|-------------|---------------------------|-------|--------|
| 1        | 0.74  | 194.079          | 194.079        | 1.26       | 112.9858,176.9345           | C7 H14 O6   | beta-Methyl-D-glucoside   | ✓     | ✓      |
| 2        | 0.756 | 120.0423         | 120.0423       | 2.43       | 616.6543                    | C4 H8 O4    | Methyl allyl tetrasulfide | ✓     | ✓      |
| 3        | 0.756 | 180.0634         | 180.0634       | 1.21       | 124.0433,400.5046,977.3344  | C6 H12 O6   | Cocositol                 | ✓     | ✓      |
| 4        | 0.831 | 342.1162         | 342.1162       | 1.1        | 245.0399,1064.3185          | C12 H22 O11 | Cellobiose                | ✓     | ✓      |
| 5        | 0.856 | 150.0528         | 150.0528       | 1.48       | 426.1106,740.8576           | C5 H10 O5   | Apiose                    | ✓     | ✓      |
| 6        | 0.856 | 278.1002         | 278.1002       | 2.32       | 101.0246,197.3849           | C11 H18 O8  | Tuliposide A              | ✓     | ✓      |
| 7        | 1.038 | 150.0528         | 150.0528       | 1.2        | 968.8609,1055.9846          | C5 H10 O5   | Apiose                    | ✓     | ✓      |
| 8        | 1.038 | 196.0583         | 196.0583       | 0.93       | 368.0468                    | C6 H12 O7   | Gluconic acid             | ✓     | ✓      |
| 9        | 1.08  | 76.016           | 76.016         | 0.99       | 112.9856,395.2799,1095.0428 | C2 H4 O3    | Glycolic acid             | ✓     | ✓      |
| 10       | 1.08  | 90.0317          | 90.0317        | 0.82       | 125.3414                    | C3 H6 O3    | Dihydroxyacetone          | ✓     | ✓      |
| 11       | 1.329 | 46.0055          | 46.0055        | 1.6        | 1635.3649                   | C H2 O2     | Formic acid               | ✓     | ✓      |
| 12       | 1.329 | 106.0266         | 106.0266       | 1.3        | 567.0849,1227.0691          | C3 H6 O4    | D-Glyceric acid           | ✓     | ✓      |
| 13       | 1.404 | 210.074          | 210.074        | 1.21       | 721.5432                    | C7 H14 O7   | Coriose                   | ✓     | ✓      |
| 14       | 1.404 | 164.0685         | 164.0685       | 1.81       | 317.2131,1079.9937          | C6 H12 O5   | 2-O-Methyl-D-xylose       | ✓     | ✓      |
| 15       | 1.504 | 150.0164         | 150.0164       | 0.85       | 259.7354,393.0590           | C4 H6 O6    | Tartaric acid             | ✓     | ✓      |
| 16       | 1.504 | 210.0376         | 210.0376       | 0.61       | 461.7537,1195.5139          | C6 H10 O8   | Mucic acid                | ✓     | ✓      |
| 17       | 1.529 | 88.016           | 88.016         | 0.74       | 248.1214,647.9147,1461.2433 | C3 H4 O3    | Pyroracemic acid          | ✓     | ✓      |
| 18       | 1.529 | 134.0215         | 134.0215       | 0.56       | 213.4008,324.1017,368.3939  | C4 H6 O5    | Malic acid                | ✓     | ✓      |

|    |        |          |          |       |                                  |             |                                                                                            |   |   |
|----|--------|----------|----------|-------|----------------------------------|-------------|--------------------------------------------------------------------------------------------|---|---|
| 19 | 1.637  | 194.0426 | 194.0426 | 1.13  | 1161.9264                        | C6 H10 O7   | Glucuronic acid                                                                            | √ | √ |
| 20 | 2.326  | 132.0059 | 132.0059 | 1.49  | 115.0047                         | C4 H4 O5    | Oxalacetic acid                                                                            | √ | √ |
| 21 | 2.326  | 192.027  | 192.027  | 1.02  | 176.9365,532.1482                | C6 H8 O7    | Citric acid                                                                                | √ | √ |
| 22 | 9.454  | 184.1099 | 184.1099 | 2.35  |                                  | C10 H16 O3  | Elsholtzidiol                                                                              | √ | √ |
| 23 | 9.603  | 346.1628 | 346.1628 | 1.38  | 154.9723,247.8580,3<br>27.8214   | C16 H26 O8  | Picrocrocinic acid                                                                         | √ | √ |
| 24 | 10.276 | 478.1686 | 478.1686 | 0.92  | 322.8507,424.7964                | C20 H30 O13 | 2,4,6-Trimethoxyphenol-<br>1-O-beta-D-apiofuranosy<br>l-(1-->6)-beta-D-glucopy<br>ranoside | √ | √ |
| 25 | 10.276 | 432.1632 | 432.1632 | 0.63  | 612.9297,336.8868                | C19 H28 O11 | 2-C-Methyl-D-erythritol<br>1-O-beta-D-(6-O-4-meth<br>oxybenzoyl)glucopyrano<br>side        | √ | √ |
| 26 | 10.276 | 492.1843 | 492.1843 | 1.02  | 322.8509,440.7707                | C21 H32 O13 | Cistanoside E                                                                              | √ | √ |
| 27 | 10.592 | 136.0524 | 136.0524 | 1.2   | 171.5367,236.0642,6<br>46.6670   | C8 H8 O2    | 4-Methyl salicylaldehyde                                                                   | √ | √ |
| 28 | 10.592 | 150.0681 | 150.0681 | 1.08  | 816.3961,1046.0708,<br>1370.9614 | C9 H10 O2   | 3,4-Dimethylbenzoic<br>acid                                                                | √ | √ |
| 29 | 10.592 | 196.0736 | 196.0736 | 0.83  | 512.2025,1641.8895               | C10 H12 O4  | 2,4-Dihydroxy-6-methox<br>y-3-methylacetophenone                                           | √ | √ |
| 30 | 11.929 | 330.3678 | 330.3678 | 1.33  | 144.0295,199.3524,2<br>32.9037   | C16 H26 O7  | Picrocrocin                                                                                | √ | √ |
| 31 | 12.502 | 342.1315 | 342.1315 | -0.34 | 180.0788                         | C16 H22 O8  | Baihuaqianhuoside                                                                          | √ | √ |
| 32 | 12.502 | 356.1471 | 356.1471 | 0.42  | 322.8457,415.7080                | C17 H24 O8  | Methylconiferin                                                                            | √ | √ |
| 33 | 12.502 | 402.1526 | 402.1526 | 0.37  | 181.0852,242.8844                | C18 H26 O10 | Acetylcatapol                                                                              | √ | √ |
| 34 | 14.371 | 424.2097 | 424.2097 | 1.5   | 211.0616,343.1396,5<br>64.7025   | C22 H32 O8  | Didrovaltratum                                                                             | √ | √ |
| 35 | 14.371 | 438.2254 | 438.2254 | 1.45  | 362.8406,441.1168,8<br>05.9847   | C23 H34 O8  | Enanderinanin G                                                                            | √ | √ |

|    |        |          |          |      |                    |             |              |   |   |
|----|--------|----------|----------|------|--------------------|-------------|--------------|---|---|
| 36 | 64.023 | 975.9746 | 975.9746 | 1.56 |                    | C44 H64 O24 | Crocin I     | √ | √ |
| 37 | 68.970 | 813.8245 | 813.8245 | 1.20 |                    | C38 H54 O19 | Crocin II    | √ | √ |
| 38 | 80.717 | 284.2351 | 284.2351 | 1.03 | 532.1794,1394.3914 | C17 H32 O3  | Muricatacin  | √ | √ |
| 39 | 80.717 | 330.2406 | 330.2406 | 0.88 | 232.9020,154.9741  | C18 H34 O5  | Sanleng acid | √ | √ |
| 40 | 82.13  | 652.2731 | 652.2731 | 1.55 | 456.8463,554.8148  | C32 H44 O14 | Crocin III   | √ | √ |

---
